# Supplementary material
Source: PubMed Central journal article supplement (PMC7855510)
Supplement: NIHMS1638279-supplement-Supplemental_Figure_1.pdf [file NIHMS1638279-supplement-Supplemental_Figure_1.pdf]

# Supplemental Figure 1

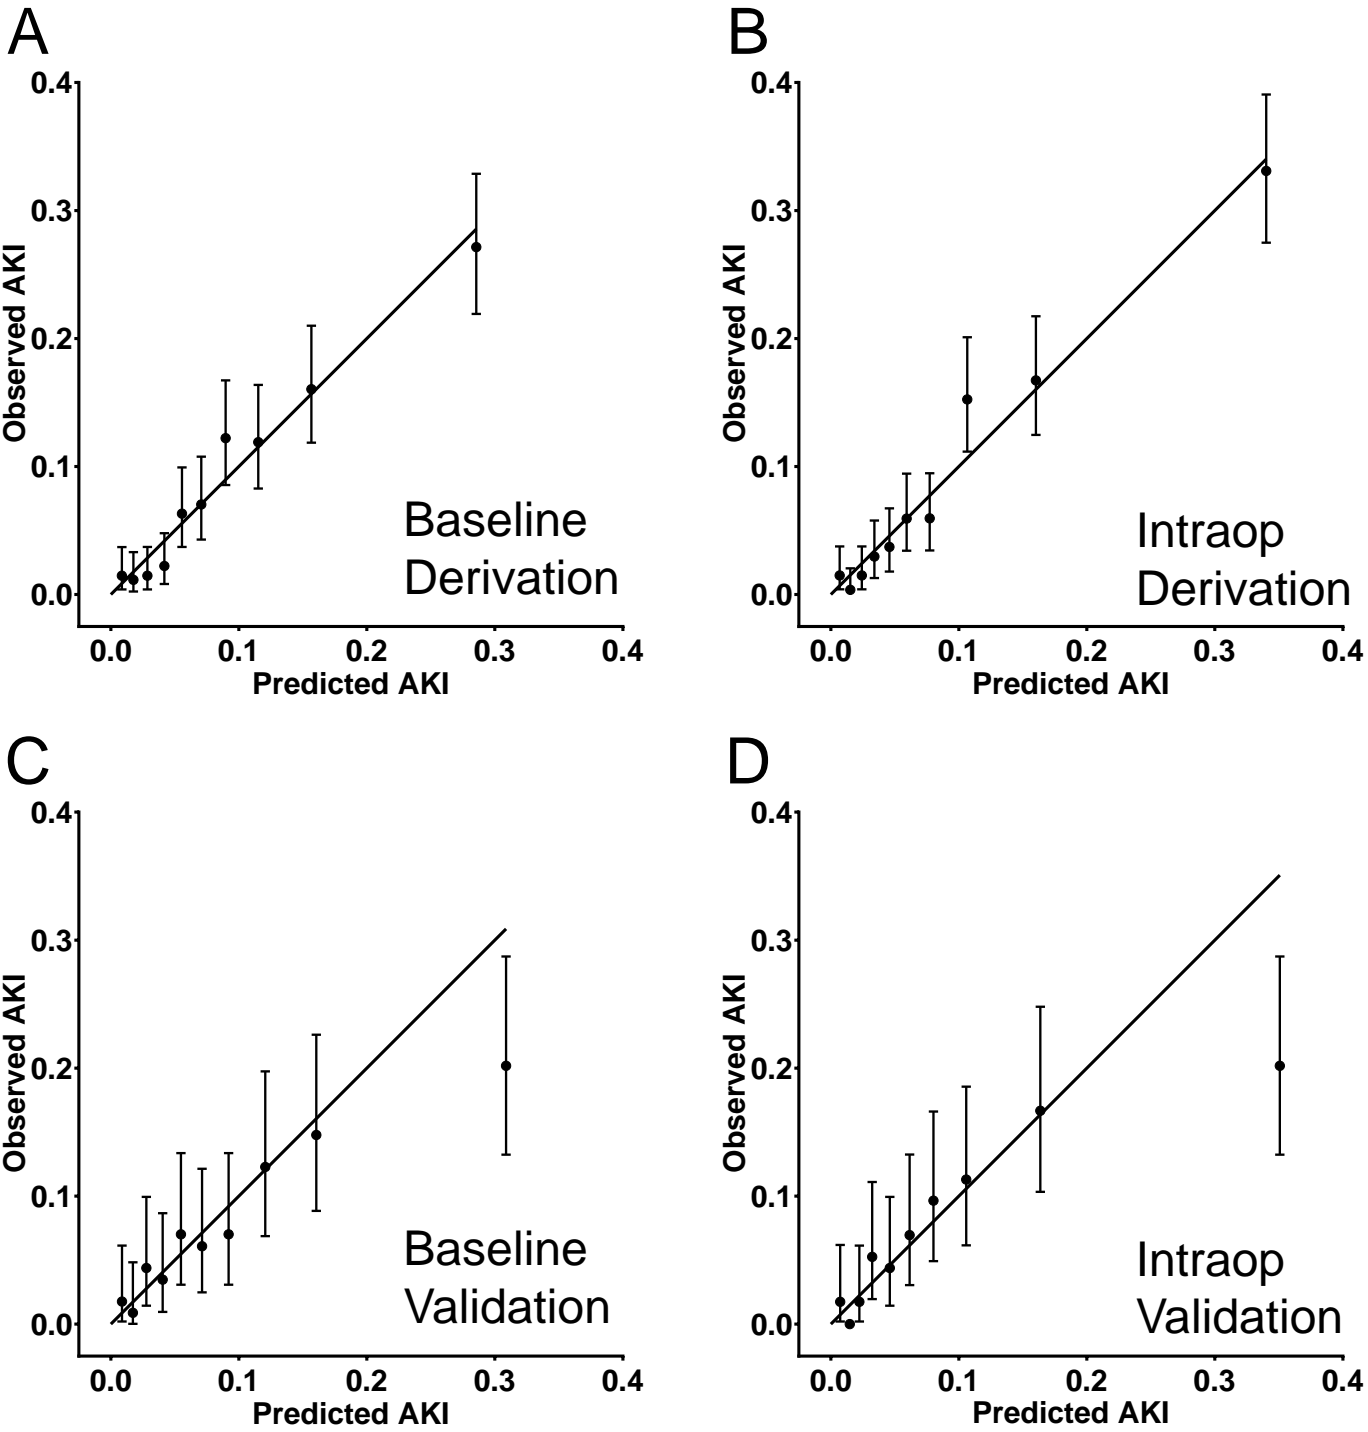

**Supplemental Figure 1.** Calibration plots of predicted acute kidney injury (AKI) risk vs. observed AKI rate, by decile of predicted AKI risk, in intraabdominal surgery patients. Plots are displayed for (A) baseline model in the derivation cohort, (B) intraoperative model in the derivation cohort, (C) baseline model in the validation cohort, and (D) intraoperative model in the validation cohort.
