# Supplementary material
Source: PubMed Central journal article supplement (PMC7855510)
Supplement: NIHMS1638279-supplement-Supplemental_Figure_2.pdf [file NIHMS1638279-supplement-Supplemental_Figure_2.pdf]

# Supplemental Figure 2

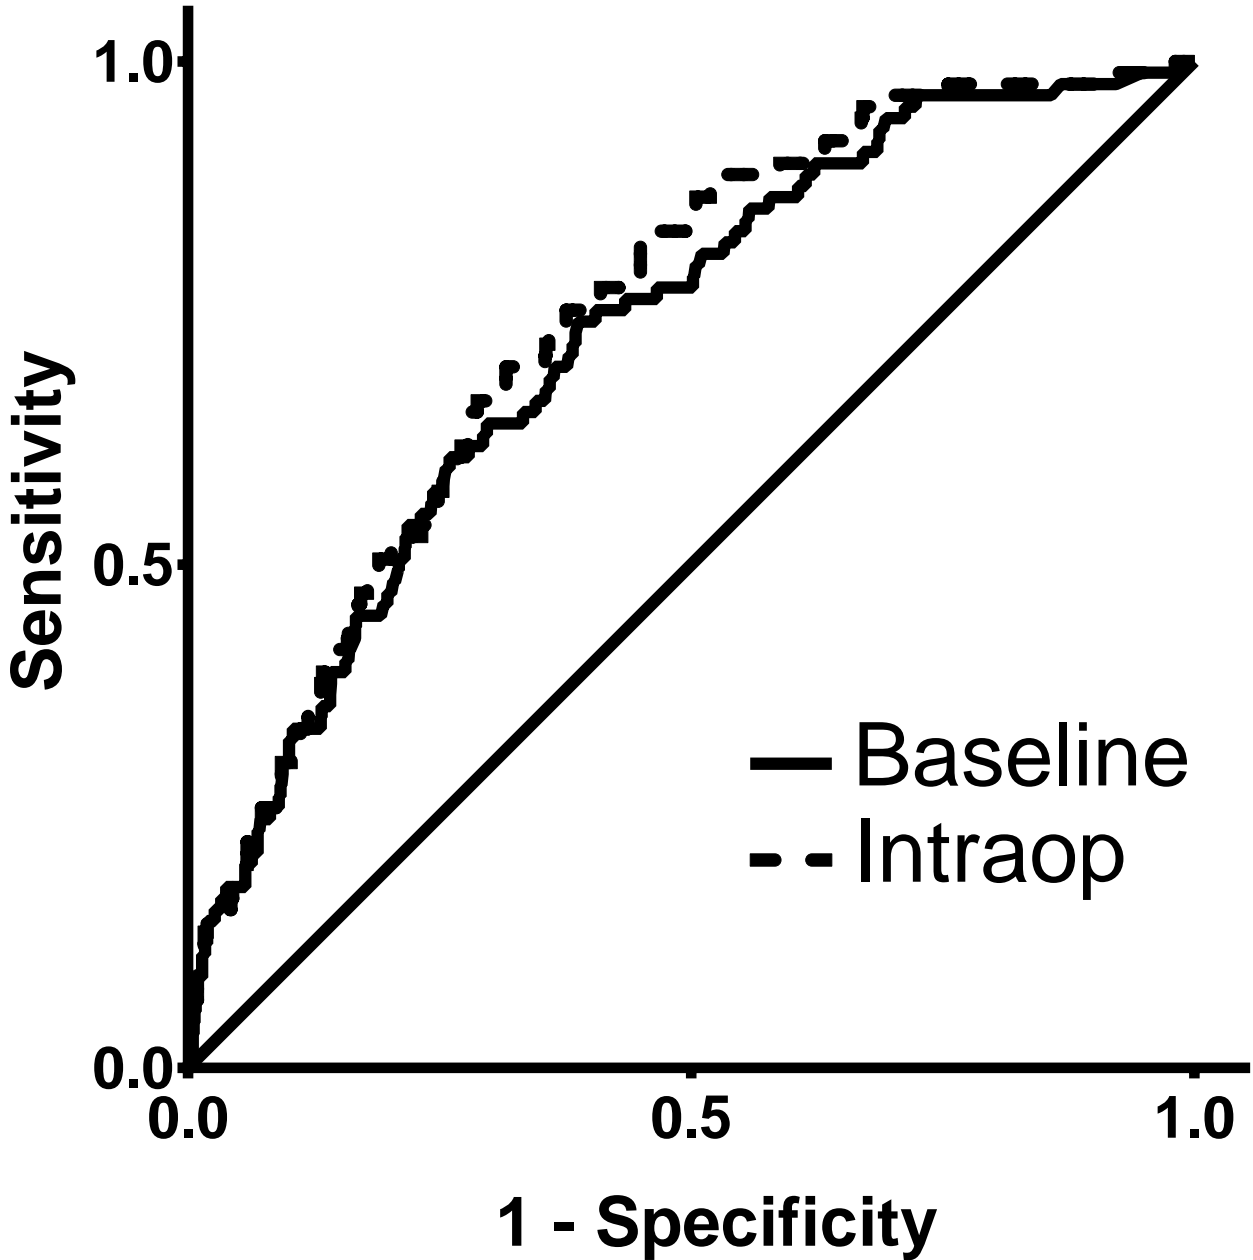

**Supplemental Figure 2.** Receiver operator characteristic curves of prediction models for postoperative acute kidney injury in intraabdominal surgery patients, validation cohort. Parameters estimated for the baseline and intraoperative (Intraop) models in the derivation cohort were applied to the validation cohort.
