# Supplementary material
Source: PubMed Central journal article supplement (PMC7855510)
Supplement: NIHMS1638279-supplement-Supplemental_Table_1.pdf [file NIHMS1638279-supplement-Supplemental_Table_1.pdf]

**Supplemental Table 1: Clinical Classifications Software for Services and Procedures Categories for Intraabdominal Surgery.**

| <b>Category Name</b>                                                                                                                       | <b>Current Procedural Terminology Codes</b>                                                                                                                                                                                                                                                                                                                                      |
|--------------------------------------------------------------------------------------------------------------------------------------------|----------------------------------------------------------------------------------------------------------------------------------------------------------------------------------------------------------------------------------------------------------------------------------------------------------------------------------------------------------------------------------|
| Appendectomy                                                                                                                               | 44950-44979, 49315, 56315                                                                                                                                                                                                                                                                                                                                                        |
| Cholecystectomy and common duct exploration                                                                                                | 47400-47460, 47550, 47562-47564, 47600-47630, 49310-49311, 56324-56342                                                                                                                                                                                                                                                                                                           |
| Colorectal resection                                                                                                                       | 44139-44160, 44204-44208, 44210-44213, 45110-45136, 45160, 45171-45172, 45395-45397, 45402, 45550                                                                                                                                                                                                                                                                                |
| Colostomy, temporary and permanent                                                                                                         | 44188, 44320-44345, 44605, 45563, 45805, 45825, 57307                                                                                                                                                                                                                                                                                                                            |
| Excision, lysis peritoneal adhesions                                                                                                       | 44005, 44200, 56304, 56310, 56352                                                                                                                                                                                                                                                                                                                                                |
| Exploratory laparotomy                                                                                                                     | 43605, 49000-49010, 49220                                                                                                                                                                                                                                                                                                                                                        |
| Gastrectomy, partial and total                                                                                                             | 43620-43634, 43638-43639                                                                                                                                                                                                                                                                                                                                                         |
| Gastric bypass and volume reduction                                                                                                        | 43644-43645, 43770-43775, 43842-43843, 43845-43848, 43886-43888                                                                                                                                                                                                                                                                                                                  |
| Ileostomy and other enterostomy                                                                                                            | 44015, 44130, 44186-44187, 44201, 44300-44316, 47802, 48001, 48150, 48152-48154, 49441-49446, 49451, 56347                                                                                                                                                                                                                                                                       |
| Local excision of large intestine lesion (not endoscopic)                                                                                  | 44110-44111                                                                                                                                                                                                                                                                                                                                                                      |
| Other hernia repair                                                                                                                        | 39502-39541, 43281-43282, 43332-43337, 43885, 44346, 49540, 49560-49611, 49652-49659, 55540                                                                                                                                                                                                                                                                                      |
| Other operating room gastrointestinal therapeutic procedures ( <i>mainly hepatobiliary and pancreatic procedures</i> )                     | 0141T-0143T, 44040, 44131, 44137, 44364-44369, 44600, 44610, 47010-47015, 47120-47134, 47300-47399, 47480-47490, 47510-47511, 47554-47556, 47570, 47701-47801, 47900-48000, 48005-48020, 48105-48148, 48151, 48155, 48180, 48500-48550, 48556-48999, 49020-49061, 49085, 49200-49215, 49250-49255, 49402, 49412-49423, 49425-49426, 49428-49436, 49460, 49900-49999, 56348-56349 |
| Other operating room lower gastrointestinal therapeutic procedures ( <i>intestinal and colorectal procedures not in another category</i> ) | 0170T, 0184T, 44021, 44050-44055, 44180, 44227, 44370-44372, 44602-44604, 44620-44660, 44680-44901, 45000-45020, 45108, 45150, 45170, 45180, 45400, 45540-45541, 45562, 45800, 45820, 45900-45915, 45999-46080, 46200-46211, 46270-46288, 46505, 46700-46742, 46750-46762, 46999, C9716                                                                                          |
| Procedures on spleen                                                                                                                       | 38100-38129, 56345                                                                                                                                                                                                                                                                                                                                                               |
| Small bowel resection                                                                                                                      | 43496, 44120-44128, 44132-44133, 44202-44203, 44661, S2050                                                                                                                                                                                                                                                                                                                       |
