# Supplementary material
Source: PubMed Central journal article supplement (PMC7855510)
Supplement: NIHMS1638279-supplement-Supplemental_Table_2.pdf [file NIHMS1638279-supplement-Supplemental_Table_2.pdf]

**Supplemental Table 2.** Intraoperative variables entered into risk prediction models for postoperative acute kidney injury.

| <b>Factor</b>         | <b>Variable</b>            | <b>Units/Categories</b>          |
|-----------------------|----------------------------|----------------------------------|
| <b>Anesthetics</b>    | Propofol                   | None                             |
|                       |                            | <200 mg                          |
|                       |                            | ≥200 mg                          |
|                       | Sevoflurane                | None                             |
|                       |                            | <5.5 ET%*Hours<br>≥5.5 ET%*Hours |
|                       | Isoflurane                 | Continuous (ET%*Hours)           |
|                       | Desflurane                 | Continuous (ET%*Hours)           |
|                       | Nitrous Oxide              | Continuous (ET%*Hours)           |
|                       |                            |                                  |
| <b>Beta Blockers</b>  | Esmolol                    | Continuous (mg)                  |
|                       | Labetalol                  | Continuous (mg)                  |
|                       | Metoprolol                 | Continuous (mg)                  |
| <b>Blood Pressure</b> | MAP Mean                   | Continuous (mm Hg)               |
|                       | MAP CV                     | Continuous (Unitless)            |
|                       | SBP Mean                   | Continuous (mm Hg)               |
|                       | SBP SD                     | Continuous (mm Hg)               |
|                       | DBP Mean                   | Continuous (mm Hg)               |
|                       | DBP CV                     | Continuous (Unitless)            |
|                       | Minutes with MAP <60 mm Hg | Continuous (min)                 |
|                       | Minutes with MAP >90 mm Hg | Continuous (min)                 |
| <b>Diuretics</b>      | Furosemide                 | No                               |
|                       |                            | Yes                              |
| <b>Fluids</b>         | Lactated Ringer's          | ≤3600 mL                         |
|                       |                            | >3600 mL                         |
|                       | Albumin                    | None                             |
|                       |                            | ≤250 mL<br>>250 mL               |
|                       | Red Blood Cells            | None                             |
|                       |                            | ≤1000 mL<br>>1000 mL             |
|                       | Colloids                   | No                               |
|                       |                            | Yes                              |
|                       | Plasma                     | No                               |
|                       |                            | Yes                              |
| Normal Saline         | Continuous (mL)            |                                  |
|                       | Estimated Blood Loss       | Continuous (mL)                  |
|                       | Urine Output               | ≤250 mL                          |
|                       |                            | 250-600 mL                       |
|                       |                            | >600 mL                          |
| <b>Operative Time</b> | Operative Time             | Continuous (min)                 |
| <b>Opioids</b>        | Fentanyl                   | Continuous (mcg)                 |
|                       | Hydromorphone              | Continuous (mg)                  |
|                       | Morphine                   | Continuous (mg)                  |
| <b>Vasopressors</b>   | Phenylephrine              | 0-400 mcg                        |
|                       |                            | >400 mcg                         |
|                       | Ephedrine                  | <30 mg                           |
|                       |                            | ≥30 mg                           |
|                       | Norepinephrine             | No                               |
|                       |                            | Yes                              |
| Epinephrine           | None                       |                                  |
|                       | ≤150 mcg<br>>150 mcg       |                                  |
|                       | Vasopressin                | Continuous (Units)               |

ET, End Tidal Concentration; MAP, mean arterial pressure; SBP, systolic blood pressure; DBP, diastolic blood pressure; CV, coefficient of variation.
