# Supplementary material
Source: PubMed Central journal article supplement (PMC7855510)
Supplement: NIHMS1638279-supplement-Supplemental_Table_3.pdf [file NIHMS1638279-supplement-Supplemental_Table_3.pdf]

**Supplemental Table 3.** Model and test characteristics using  $\geq 9.0\%$  threshold to denote high risk patients, comparing baseline and intraoperative models for postoperative acute kidney injury in intraabdominal surgery patients.

|             | Baseline Model |          | Intraoperative Model |          | $\Delta^{\dagger}$ | P-Value <sup>†</sup> |
|-------------|----------------|----------|----------------------|----------|--------------------|----------------------|
|             | Value          | 95% CI   | Value                | 95% CI   |                    |                      |
| Sensitivity | 71             | (65, 76) | 74                   | (69, 80) | 3.8                | 0.2                  |
| Specificity | 69             | (67, 70) | 74                   | (73, 76) | 5.9                | <0.0001              |
| PPV         | 18             | (15, 20) | 22                   | (19, 25) |                    |                      |
| NPV         | 96             | (95, 97) | 97                   | (96, 98) |                    |                      |

PPV, positive predictive value; NPV, negative predictive value.

<sup>†</sup>Sensitivity and specificity between models compared using paired t-test.
