# Supplementary material
Source: PubMed Central journal article supplement (PMC7855510)
Supplement: NIHMS1638279-supplement-Supplemental_Table_4.pdf [file NIHMS1638279-supplement-Supplemental_Table_4.pdf]

**Supplemental Table 4.** Reclassification tables showing risk classification changes in multivariable logistic regression models for postoperative acute kidney injury in intraabdominal surgery patients when intraoperative variables are added to a baseline model, using a risk threshold of 9.0%.

| <b>Patients With Acute Kidney Injury</b> |                       |                             |                     |              |
|------------------------------------------|-----------------------|-----------------------------|---------------------|--------------|
|                                          |                       | <b>Intraoperative Model</b> |                     |              |
| <b>Baseline Model</b>                    | <b>AKI Risk</b>       | <b>Low (&lt;9.0%)</b>       | <b>High (≥9.0%)</b> | <b>Total</b> |
|                                          | <b>Low (&lt;9.0%)</b> | 44 (64)                     | 25 (36)             | 69           |
|                                          | <b>High (≥9.0%)</b>   | 16 (10)                     | 149 (90)            | 165          |
|                                          | <b>Total</b>          | 60                          | 174                 |              |

The reclassification proportion for this group is 0.038 (P=0.2).

| <b>Patients Without Acute Kidney Injury</b> |                       |                             |                     |              |
|---------------------------------------------|-----------------------|-----------------------------|---------------------|--------------|
|                                             |                       | <b>Intraoperative Model</b> |                     |              |
| <b>Baseline Model</b>                       | <b>AKI Risk</b>       | <b>Low (&lt;9.0%)</b>       | <b>High (≥9.0%)</b> | <b>Total</b> |
|                                             | <b>Low (&lt;9.0%)</b> | 1591 (94)                   | 95 (5.6)            | 1686         |
|                                             | <b>High (≥9.0%)</b>   | 239 (31)                    | 532 (69)            | 771          |
|                                             | <b>Total</b>          | 1830                        | 627                 |              |

The reclassification proportion for this group is 0.059 (P<0.0001).

Green boxes identify patients in whom risk prediction improved with the addition of intraoperative variables, while orange boxes identify patients in whom risk prediction worsened with the addition of intraoperative variables. For each table, reclassification proportion is the net total improvement (patients in green box - patients in red box) divided by the total number of patients.
